# Supplementary material for: Testing and Treating Women after Unsuccessful Conservative Treatments for Overactive Bladder or Mixed Urinary Incontinence: A Model-Based Economic Evaluation Based on the BUS Study
Source: PubMed Central journal article supplement (PMC4981306; doi:10.1371/journal.pone.0160351), 2016-08-11
Supplement: pone.0160351.s003.pdf [file pone.0160351.s003.pdf]

**S1 Table.** Prevalence data

| <b>Parameter</b>                       | <b>Base-case value</b> | <b>Distribution<br/>(parameter values)</b> |
|----------------------------------------|------------------------|--------------------------------------------|
| Detrusor overactivity                  | 0.507                  |                                            |
| Stress incontinence                    | 0.091                  |                                            |
| Mixed incontinence                     | 0.167                  |                                            |
| Normal bladder                         | 0.172                  | Dirichlet (106, 19, 35, 36, 9, 3, 1)       |
| Low compliance only                    | 0.043                  |                                            |
| Voiding dysfunction only               | 0.014                  |                                            |
| Low compliance and voiding dysfunction | 0.005                  |                                            |
