# Supplementary material for: Testing and Treating Women after Unsuccessful Conservative Treatments for Overactive Bladder or Mixed Urinary Incontinence: A Model-Based Economic Evaluation Based on the BUS Study
Source: PubMed Central journal article supplement (PMC4981306; doi:10.1371/journal.pone.0160351), 2016-08-11
Supplement: pone.0160351.s004.pdf [file pone.0160351.s004.pdf]

**S2 Table.** Accuracy data

| Parameter*                                                     | Base-case value | Distribution<br>(parameter values) |
|----------------------------------------------------------------|-----------------|------------------------------------|
| <b><i>Urodynamics</i></b>                                      |                 |                                    |
| Diagnosis of detrusor overactivity given detrusor overactivity | 0.964           |                                    |
| Diagnosis of stress incontinence given detrusor overactivity   | 0.009           |                                    |
| Diagnosis of mixed incontinence given detrusor overactivity    | 0.009           | Dirichlet (107, 1, 1, 1, 1)        |
| Diagnosis of normal bladder given detrusor overactivity        | 0.009           |                                    |
| Diagnosis of other diagnosis given detrusor overactivity       | 0.009           |                                    |
| Diagnosis of stress incontinence given stress incontinence     | 0.833           |                                    |
| Diagnosis of mixed incontinence given stress incontinence      | 0.042           |                                    |
| Diagnosis of detrusor overactivity given stress incontinence   | 0.042           | Dirichlet (20, 1, 1, 1, 1)         |
| Diagnosis of normal bladder given stress incontinence          | 0.042           |                                    |
| Diagnosis of other diagnosis given stress incontinence         | 0.042           |                                    |
| Diagnosis of mixed incontinence given mixed incontinence       | 0.900           |                                    |
| Diagnosis of stress incontinence given mixed incontinence      | 0.025           |                                    |
| Diagnosis of detrusor overactivity given mixed incontinence    | 0.025           | Dirichlet (36, 1, 1, 1, 1)         |
| Diagnosis of normal bladder given mixed incontinence           | 0.025           |                                    |
| Diagnosis of other diagnosis given mixed incontinence          | 0.025           |                                    |
| <b><i>Bladder ultrasonography</i></b> <sup>†</sup>             |                 |                                    |
| Diagnosis of detrusor overactivity given detrusor overactivity | 0.377           | Beta (40, 66)                      |
| Diagnosis of detrusor overactivity given mixed incontinence    | 0.514           | Beta (18, 17)                      |
| Diagnosis of detrusor overactivity given stress incontinence   | 0.474           | Beta (9, 10)                       |
| Diagnosis of detrusor overactivity given normal bladder        | 0.444           | Beta (16, 20)                      |
| Diagnosis of detrusor overactivity given other syndrome        | 0.462           | Beta (6, 7)                        |
| <b><i>Clinical history</i></b> <sup>‡</sup>                    |                 |                                    |
| Diagnosis of overactive bladder given detrusor overactivity    | 0.481           | Beta (51, 55)                      |
| Diagnosis of overactive bladder given mixed incontinence       | 0.114           | Beta (4, 31)                       |
| Diagnosis of overactive bladder given stress incontinence      | 0.105           | Beta (2, 17)                       |
| Diagnosis of overactive bladder given normal bladder           | 0.500           | Beta (18, 18)                      |
| Diagnosis of overactive bladder given other syndrome           | 0.692           | Beta (9, 4)                        |

\*When a single diagnostic test is used to determine the presence or absence of a single condition, it is usual to express the test accuracy in terms of sensitivity and specificity. However, when there are more possibilities than simply “disease positive/negative” and “test positive/negative”, these terms cease to be helpful. Instead, it is appropriate to give the conditional probability of a given test result subject to a given actual underlying condition.

<sup>†</sup> Bladder ultrasonography is used to measure bladder wall thickness (BWT). If BWT is  $\geq 5$ mm we assume that the test is positive for detrusor overactivity and negative otherwise

<sup>‡</sup> Detrusor overactivity (DO) is an urodynamic observation, and thus overactive bladder is used to predict DO and subsequently the right treatment pathway. Women with DO, or other urodynamic diagnoses, who did not have a clinical history of overactive bladder had a clinical history of mixed incontinence
