# Supplementary material for: Testing and Treating Women after Unsuccessful Conservative Treatments for Overactive Bladder or Mixed Urinary Incontinence: A Model-Based Economic Evaluation Based on the BUS Study
Source: PubMed Central journal article supplement (PMC4981306; doi:10.1371/journal.pone.0160351), 2016-08-11
Supplement: pone.0160351.s005.pdf [file pone.0160351.s005.pdf]

**S3 Table. Results of univariate and multivariate sensitivity analyses**

| <b>Test-treat strategy</b>                                                                           | <b>ICER per woman successfully treated</b> | <b>ICER per QALY</b> |
|------------------------------------------------------------------------------------------------------|--------------------------------------------|----------------------|
| <b><i>Reducing the cost of urodynamics (first analysis)</i></b>                                      |                                            |                      |
| Urodynamics                                                                                          |                                            |                      |
| Clinical history                                                                                     | £602,800                                   | £73,900              |
| <b><i>Reducing the cost of urodynamics (second analysis)</i></b>                                     |                                            |                      |
| Urodynamics for all women                                                                            |                                            |                      |
| Urodynamics for women with clinical history of mixed incontinence                                    | £23,200                                    | £15,100              |
| Bladder ultrasonography for women with clinical history of mixed incontinence                        | £100,000                                   | Dominated            |
| <b><i>Increasing the cost of sling surgery (first analysis)</i></b>                                  |                                            |                      |
| Urodynamics                                                                                          |                                            |                      |
| Clinical history                                                                                     | £706,800                                   | £86,600              |
| <b><i>Increasing the cost of sling surgery (second analysis)</i></b>                                 |                                            |                      |
| Urodynamics for all women                                                                            |                                            |                      |
| Urodynamics for women with clinical history of mixed incontinence                                    | £17,600                                    | £11,400              |
| Bladder ultrasonography for women with clinical history of mixed incontinence                        | £119,100                                   | Dominated            |
| <b><i>Lowering the utility of women subjectively cured (first analysis)</i></b>                      |                                            |                      |
| Urodynamics                                                                                          |                                            |                      |
| Clinical history                                                                                     | £491,100                                   | Dominated            |
| <b><i>Lowering the utility of women subjectively cured (second analysis)</i></b>                     |                                            |                      |
| Urodynamics for all women                                                                            |                                            |                      |
| Urodynamics for women with clinical history of mixed incontinence                                    | £19,500                                    | £22,500              |
| Bladder ultrasonography for women with clinical history of mixed incontinence                        | £78,600                                    | Dominated            |
| <b><i>Altering the diagnostic accuracy of urodynamics and clinical history (first analysis)</i></b>  |                                            |                      |
| Urodynamics                                                                                          |                                            |                      |
| Clinical history                                                                                     | £63,700                                    | £31,000              |
| <b><i>Altering the diagnostic accuracy of urodynamics and clinical history (second analysis)</i></b> |                                            |                      |
| Urodynamics for all women                                                                            |                                            |                      |
| Urodynamics for women with clinical history of mixed incontinence                                    | £16,500                                    | £10,500              |
| Bladder ultrasonography for women with clinical history of mixed incontinence                        | £39,600                                    | Dominated            |
| <b><i>Placing elicited values to the lowest limit (first analysis)</i></b>                           |                                            |                      |
| Urodynamics                                                                                          |                                            |                      |
| Clinical history                                                                                     | Dominated                                  | £66,900              |
| <b><i>Placing elicited values to the lowest limit (second analysis)</i></b>                          |                                            |                      |
| Urodynamics for all women                                                                            |                                            |                      |
| Urodynamics for women with clinical history of mixed incontinence                                    | £20,900                                    | £13,100              |
| <b><i>Placing elicited values to the highest limit (first analysis)</i></b>                          |                                            |                      |
| Urodynamics                                                                                          |                                            |                      |
| Clinical history                                                                                     | £30,700                                    | £21,000              |
| BUS                                                                                                  | £34,800                                    | Dominated            |
| <b><i>Placing elicited values to the highest limit (second analysis)</i></b>                         |                                            |                      |
| Urodynamics for all women                                                                            |                                            |                      |
| Bladder ultrasonography for women with clinical history of mixed incontinence                        | £14,000                                    | Dominated            |
| Urodynamics for women with clinical history of mixed incontinence                                    | Dominated                                  | £11,500              |
| Clinical history                                                                                     | Dominated                                  | £83,800              |
| <b><i>Conducting one diagnostic test (first analysis)</i></b>                                        |                                            |                      |
| Urodynamics                                                                                          |                                            |                      |
| Clinical history                                                                                     | £555,000                                   | £69,500              |
| <b><i>Conducting one diagnostic test (second analysis)</i></b>                                       |                                            |                      |
| Urodynamics for all women                                                                            |                                            |                      |
| Urodynamics for women with clinical history of mixed incontinence                                    | £22,300                                    | £14,400              |

ICER, incremental cost-effectiveness ratio; QALY, quality-adjusted life-year; CI, confidence interval
